# Supplementary material
Source: PubMed Central journal article supplement (PMC6378969)
Supplement: supp_RA118.006226_141263_1_supp_254793_pk1qnx.pdf [file supp_RA118.006226_141263_1_supp_254793_pk1qnx.pdf]

## Supporting Information

IL-34 cell surface localization regulated by the molecular chaperone 78 kDa glucose-regulated protein facilitates the differentiation of monocytic cells

Sayaka Ogawa<sup>1</sup>, Yukiko Matsuoka<sup>1</sup>, Miho Takada<sup>1</sup>, Kazue Matsui<sup>1</sup>, Fumihiro Yamane<sup>1</sup>, Eri Kubota<sup>2</sup>, Shiori Yasuhara<sup>1</sup>, Kentaro Hieda<sup>1</sup>, Naoki Kanayama<sup>3</sup>, Naoya Hatano<sup>3</sup>, Hiroshi Tokumitsu<sup>3</sup>, Masaki Magari<sup>3,\*</sup>

<sup>1</sup>Division of Medical Bioengineering, Graduate School of Natural Science and Technology, Okayama University, Tsushima-Naka 3-1-1, Kita-ku, Okayama 700-8530, Japan, <sup>2</sup>Department of Applied Chemistry and Biotechnology, Faculty of Engineering, Okayama University, Tsushima-Naka 3-1-1, Kita-ku, Okayama 700-8530, Japan, <sup>3</sup>Applied Cell Biology, Graduate School of Interdisciplinary Science and Engineering in Health Systems, Okayama University, Tsushima-Naka 3-1-1, Kita-ku, Okayama 700-8530, Japan

\*To whom correspondence should be addressed: Masaki Magari, Applied Cell Biology, Graduate School of Interdisciplinary Science and Engineering in Health Systems, Okayama University, Tsushima-Naka 3-1-1, Kita-ku, Okayama 700-8530, Japan.

Tel: +81-86-251-8199; FAX: +81-86-251-8198; E-mail: magari@cc.okayama-u.ac.jp

Supporting information consists of Figure S1-6 and Table S1.

A

```

FL-Y          56221 CCTGCCTTTCCCCTCAGTACTTGTTCAGGCTTGATGATGGATGGTGGTTGATTCAGCTACG 56280
IL-34 KO#1   CCTGCCTTTCCCCTCAGTACTTGTTCAGGCTTGATG-----
IL-34 KO#2   CCTGCCTTTCCCCTCAGTACTTGTTCAGGCTTGATGATGGATGGTGGTTGATTCAGCTACG

FL-Y          56281 CACACCAGGTAGTGCGCAGACACAGTGCCCAGCGCTCATCCGCTCTTGTTGGGTGTGTCC 56340
IL-34 KO#1   -----
IL-34 KO#2   CACACCAGGTAGTGCGCAGACACAGTGCCCAGCGCTCATCCGCTCTTGTTGGGTGTGTCC

FL-Y          56341 CACAGGTCTTTGGGATCCTACTTGACGTGGCTTTGGGAAACGAGAATTTGGAGATATGGAC 56400
IL-34 KO#1   -----
IL-34 KO#2   CAC-----

                Exon 3

FL-Y          56401 TCTGACCCAAGATAAAGGAGTGTGACCTTACAGGCTACCTTCGGGGCAAGCTGCAGTACAA 56460
IL-34 KO#1   -----CAGTACAA
IL-34 KO#2   TCTGACCCAAGATAAAGGAGTGTGACCTTACAGGCTACCTTCGGGGCAAGCTGCAGTACAA

FL-Y          56461 GAACCGGCTTCAGTACATGTAACCTGGAGAGCGTCTGCCTCCCCGTGCTAGGGTTGCAA 56520
IL-34 KO#1   GAACCGGCTTCAGTACATGGTAACCTGGAGAGCGTCTGCCTCCCCGTGCTAGGGTTGCAA
IL-34 KO#2   GAACCGGCTTCAGTACATGGTAACCTGGAGAGCGTCTGCCTCCCCGTGCTAGGGTTGCAA

```

B

```

                1 M P W G L A W L Y C L G I L L D V A L G 20
FL-Y          584 ATGCCCTGGGGACTCGCCTGGCTATACTGTCTTTGGGATCCTACTTGACGTGGCTTTGGGA
IL-34 KO      ATGCCCTGGGGACTCGCCTGGCTATACTAAACATTACTTCCCCATCAACTACAGGATTGC
#1#2#3        1 M P W G L A W L Y * 10

                21 N E N // P G S P S S S H G S L P * 235
FL-Y          644 AACGAGAAT // CCCGGATCCCCAAGCTCAAGCCATGGCTCGTTGCCCTGA 1291

```

**Supplemental Figure S1. Generation of IL-34 KO FL-Y**

(A) Genomic DNA extracted from IL-34 KO FL-Y (#1 and #2) clones was subjected to PCR amplification of the *Il34* gene. DNA Sequence of the *Il34* gene in IL-34 KO FL-Y cells was compared with that in the original FL-Y line. (B) Sequence of *Il34* mRNA extracted from IL-34 KO FL-Y cells as shown in Fig. 1C (top panel).

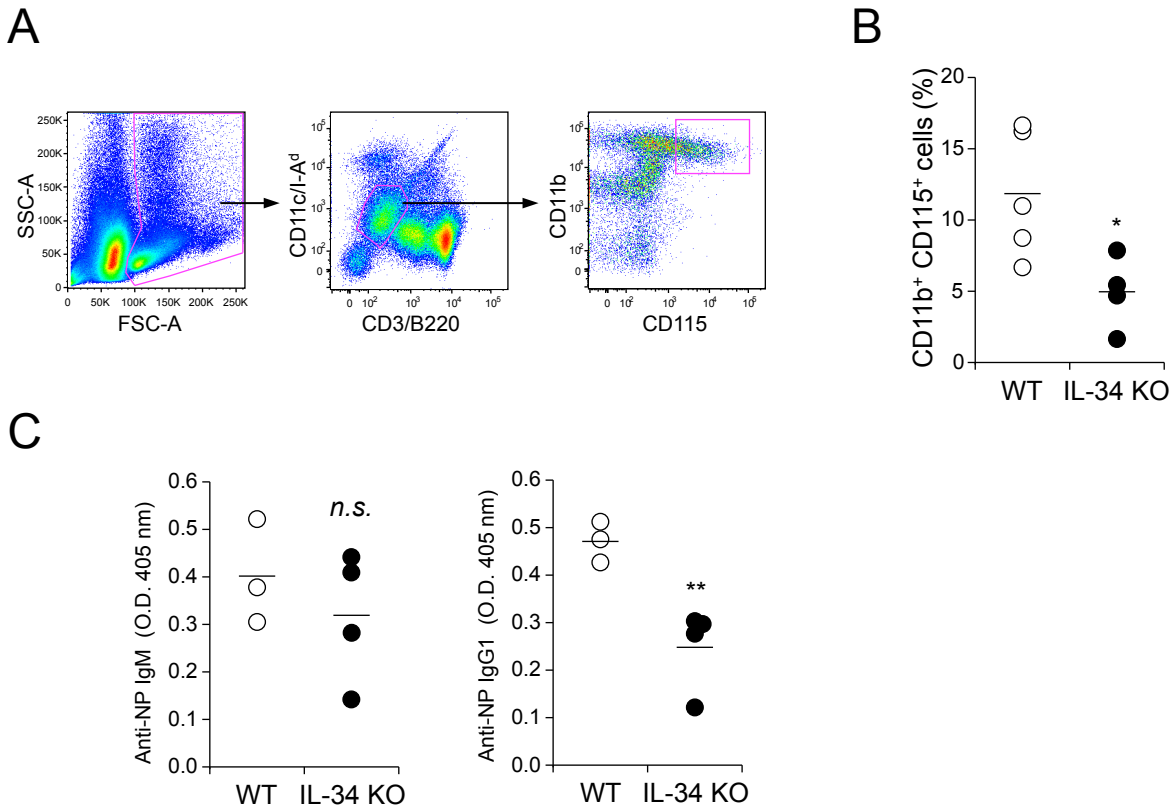

### Supplemental Figure S2. Antibody responses are significantly suppressed in IL-34 KO mice.

(A, B) Reduced number of FDMC-like cells in the spleen of IL-34 KO mice after immunization. Wild-type (WT) and IL-34 KO mice were immunized with 50  $\mu$ g of 4-hydroxy-3-nitrophenylacetyl-conjugated chicken  $\gamma$  globulin (NP-CGG) plus 2 mg alum intraperitoneally. After 12 days, splenocytes were prepared from immunized mice and used for analyses of FDMC-like cells. IL-34 KO mice were kindly provided by Prof. Burkhard Becher at the University of Zürich. (A) T cell and adherent cell-depleted splenocytes were treated with 10  $\mu$ g/mL rat IgG at 4  $^{\circ}$ C for 15 min, and subsequently stained with fluorescence-labeled antibodies at 4  $^{\circ}$ C for 30 min. The following antibodies were used: APC-anti-CD11b, PE-anti-CD115, Pacific blue-anti-B220, Pacific blue-anti-CD3, FITC-anti-I-A<sup>d</sup>, and FITC-anti-CD11c. The frequency of FDMC-like cells was estimated by measuring the percentage of CD11b<sup>+</sup>CD115<sup>+</sup> cells in a B220<sup>-</sup>CD3<sup>-</sup>I-A<sup>d</sup><sup>-</sup>CD11c<sup>-</sup>-gated population using a FACSARIA flow cytometer. (B) The frequency of FDMC-like cells was estimated by detecting CD11b<sup>+</sup>CD115<sup>+</sup> cells in CD3<sup>-</sup>B220<sup>-</sup>I-A<sup>d</sup><sup>-</sup>CD11c<sup>-</sup>-gated population in the spleen cells from each mouse. Statistical differences are marked: \*,  $p < 0.05$  versus WT mice. (C) Antigen-specific antibody responses in IL-34 KO mice after immunization. WT (open circles) and IL-34 KO (closed circles) mice were immunized with 5  $\mu$ g of NP-CGG plus 2 mg alum intraperitoneally, and serum was collected on day 12 after immunization. Anti-NP IgG1 Ab levels in sera were assayed by ELISA using microplates coated with NP<sub>25</sub>-BSA. Anti-NP IgM and IgG1 Abs bound to the plates were detected with peroxidase-conjugated goat anti-mouse IgM (Invitrogen) or peroxidase-conjugated goat anti-mouse IgG1 Ab (SouthernBiotech, Birmingham, AL, USA), respectively. Statistical differences are marked: *n.s.*, not significant, \*\*,  $p < 0.01$  versus WT mice.

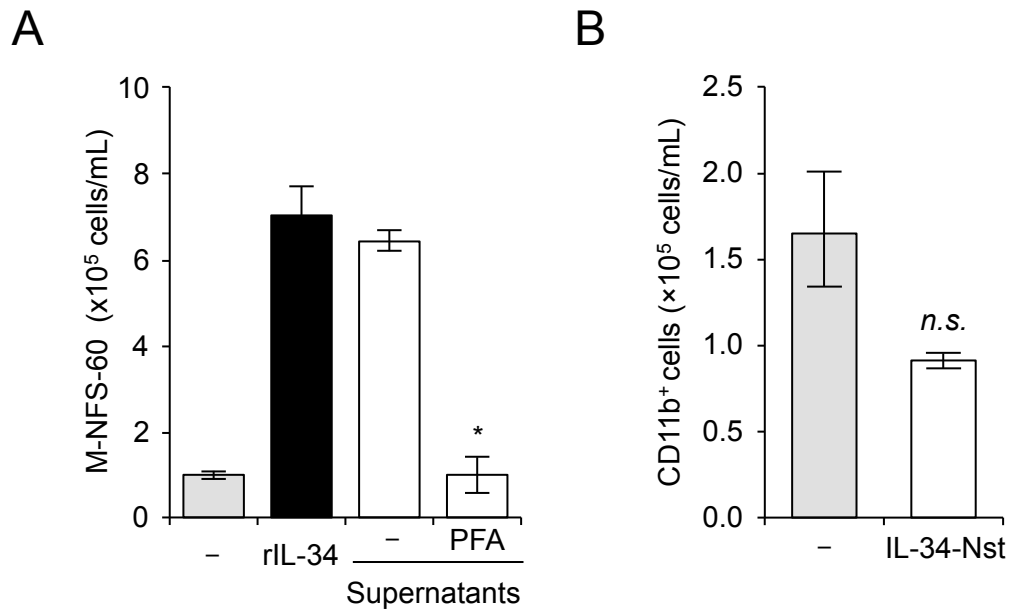

**Supplemental Figure S3. Soluble IL-34 secreted from FL-Y is not involved in FDMC differentiation.**

(A) M-NFS-60 ( $1 \times 10^4$  cells/mL) were cultured the medium containing none (-), 10 ng/mL recombinant mouse IL-34 (rIL-34) (BioLegend), or 5% of culture supernatants of FL-Y cells. Culture supernatants were collected after 3-day culture of FL-Y cells that were untreated (-) or treated (PFA) with 0.1% paraformaldehyde (PFA). After 3 days, number of M-NFS-60 cells was determined by hemocytometer. Data are presented as the means  $\pm$  S.D. of triplicate cultures. Statistical differences are marked: \*,  $p < 0.05$  versus the culture in the presence of supernatants from PFA-untreated FL-Y cells. (B) The supernatants (20 mL) collected from FL-Y-IL-34-Nst culture were reacted with 60  $\mu$ L of Strep-Tactin sepharose (IBA) overnight at 4  $^{\circ}$ C. Then, the Strep-Tactin sepharose was centrifuged at  $390 \times g$  at 4  $^{\circ}$ C for 2 min and washed five times with 1 mL of NP buffer (50 mM  $\text{Na}_2\text{PO}_4$ /300 mM NaCl pH 8.0). Finally, IL-34-Nst protein bound to sepharose was eluted with elution buffer (MEM containing 25 mM desthiobiotin). Purified IL-34-Nst was added to medium of FDMC-inducing culture every 3 days. After 8 days, cultured cells were analyzed by flow cytometry after staining with an anti-CD11b mAb as shown in Figs. 1D and E. Data are presented as the means  $\pm$  S.D. of triplicate cultures. Statistical differences are marked: *n.s.*, not significant.

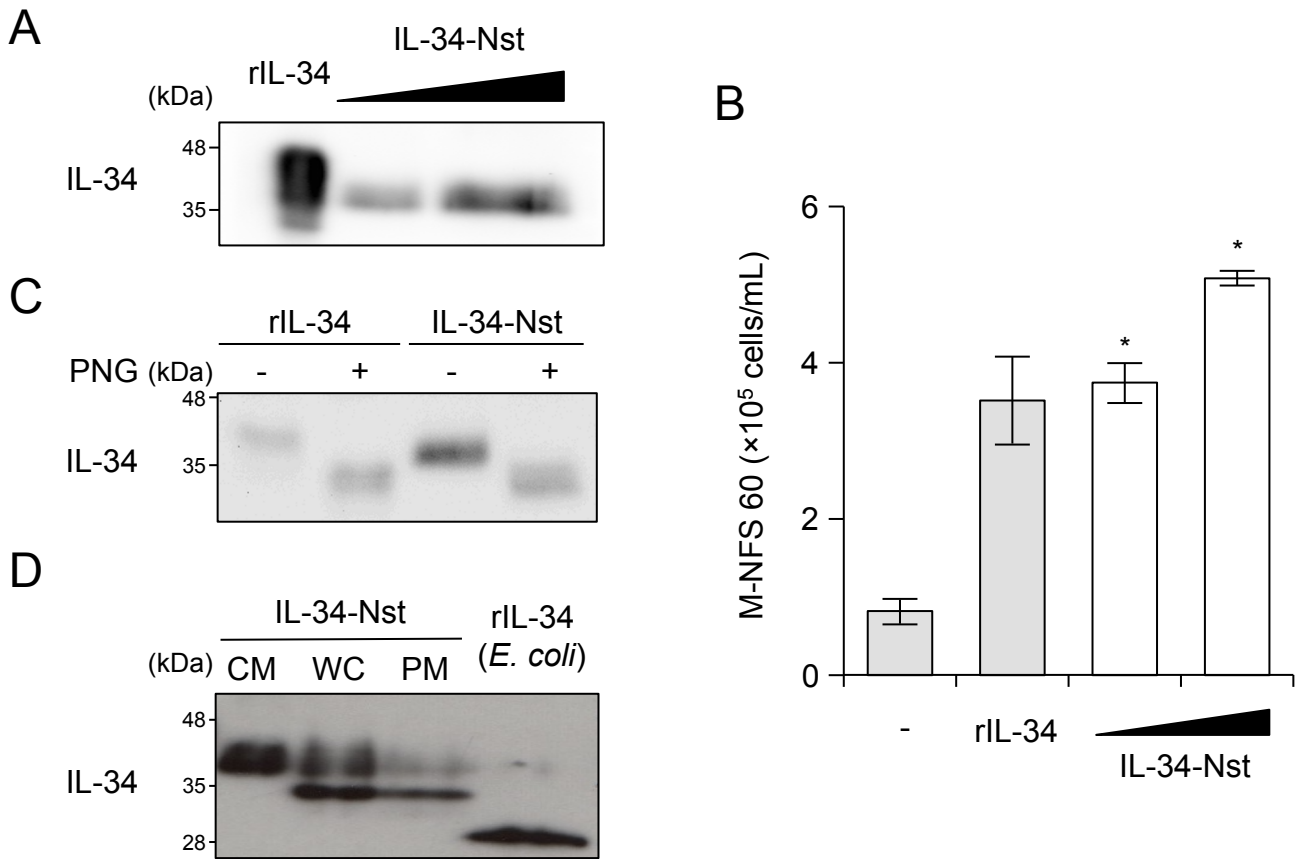

### Supplemental Figure S4. IL-34-Nst is capable of stimulating CSF-1R.

(A) IL-34-Nst was purified from FL-Y-IL-34-Nst cell-cultured medium (20 mL) by using a Strep-Tactin sepharose according to the manufacturer's instruction. Briefly, the culture medium was reacted with the Strep-Tactin sepharose resin overnight, and the resin was washed with NP buffer. IL-34-Nst bound to the resin was eluted with the elution buffer (MEM containing 25 mM desthiobiotin). The eluate was separated by SDS-PAGE and subjected to western blotting with an anti-IL-34 Ab. (B) M-NFS-60 ( $1 \times 10^4$  cells/mL) were cultured in the medium containing none (-), recombinant IL-34 (rIL-34: 10 ng/mL), or purified IL-34-Nst. After 3 days, the number of M-NFS-60 cells was determined by hemocytometer. Data are represented as the means  $\pm$  S.D. of triplicate cultures. (C) rIL-34 and purified IL-34-Nst were untreated (-) or treated (+) with PNGase (N-Zyme Scientifics) according to the manufacturer's instruction. Samples were separated by SDS-PAGE and subjected to western blotting with an anti-IL-34 Ab. (D) IL-34-Nst proteins prepared from the culture medium (CM), whole cell lysate (WC), and plasma membrane fraction (PM) of FL-Y-IL-34-Nst, and recombinant IL-34 expressed in *E. coli* were separated by SDS-PAGE and subjected to western blotting using an anti-IL-34 Ab. Data are presented as the means  $\pm$  S.D. of triplicate cultures. Statistical differences are marked: \*,  $p < 0.05$  versus unstimulated culture (-).

## GRP78: 83 NQLTSNPENTVFDK 97

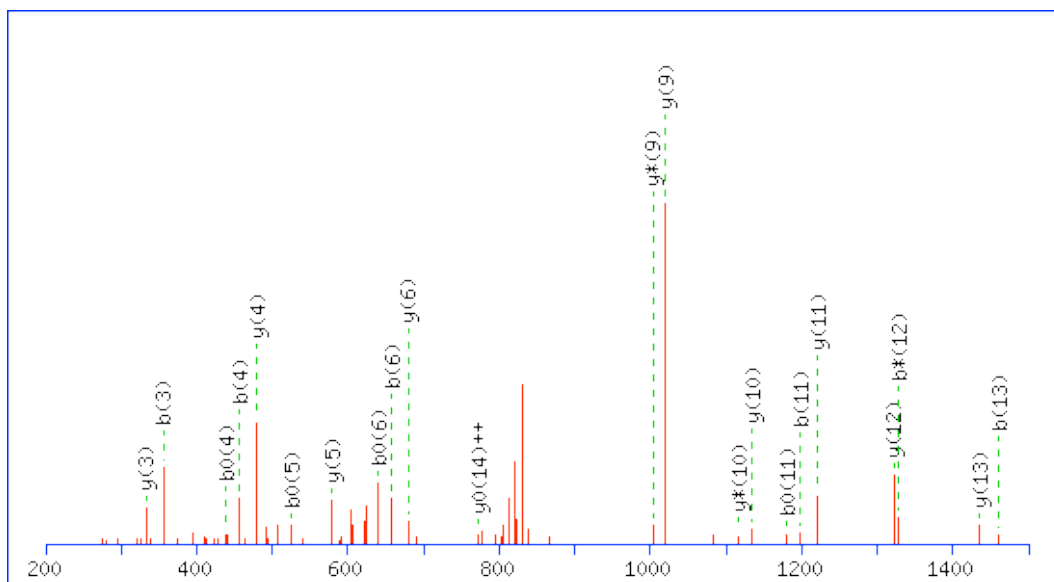

**Monoisotopic mass of neutral peptide Mr(calc): 1676.8006**

**Ions Score: 74 Expect: 1.7e-005**

**Matches : 22/158 fragment ions using 30 most intense peaks**

| #  | b         | b <sup>++</sup> | b <sup>*</sup> | b <sup>+++</sup> | b <sup>0</sup> | b <sup>0++</sup> | Seq. | y         | y <sup>++</sup> | y <sup>*</sup> | y <sup>+++</sup> | y <sup>0</sup> | y <sup>0++</sup> | #  |
|----|-----------|-----------------|----------------|------------------|----------------|------------------|------|-----------|-----------------|----------------|------------------|----------------|------------------|----|
| 1  | 115.0502  | 58.0287         | 98.0237        | 49.5155          |                |                  | N    |           |                 |                |                  |                |                  | 15 |
| 2  | 243.1088  | 122.0580        | 226.0822       | 113.5448         |                |                  | Q    | 1563.7649 | 782.3861        | 1546.7384      | 773.8728         | 1545.7544      | 773.3808         | 14 |
| 3  | 356.1928  | 178.6001        | 339.1663       | 170.0868         |                |                  | L    | 1435.7064 | 718.3568        | 1418.6798      | 709.8435         | 1417.6958      | 709.3515         | 13 |
| 4  | 457.2405  | 229.1239        | 440.2140       | 220.6106         | 439.2300       | 220.1186         | T    | 1322.6223 | 661.8148        | 1305.5957      | 653.3015         | 1304.6117      | 652.8095         | 12 |
| 5  | 544.2726  | 272.6399        | 527.2460       | 264.1266         | 526.2620       | 263.6346         | S    | 1221.5746 | 611.2909        | 1204.5481      | 602.7777         | 1203.5640      | 602.2857         | 11 |
| 6  | 658.3155  | 329.6614        | 641.2889       | 321.1481         | 640.3049       | 320.6561         | N    | 1134.5426 | 567.7749        | 1117.5160      | 559.2617         | 1116.5320      | 558.7696         | 10 |
| 7  | 755.3682  | 378.1878        | 738.3417       | 369.6745         | 737.3577       | 369.1825         | P    | 1020.4997 | 510.7535        | 1003.4731      | 502.2402         | 1002.4891      | 501.7482         | 9  |
| 8  | 884.4108  | 442.7091        | 867.3843       | 434.1958         | 866.4003       | 433.7038         | E    | 923.4469  | 462.2271        | 906.4203       | 453.7138         | 905.4363       | 453.2218         | 8  |
| 9  | 998.4538  | 499.7305        | 981.4272       | 491.2172         | 980.4432       | 490.7252         | N    | 794.4043  | 397.7058        | 777.3777       | 389.1925         | 776.3937       | 388.7005         | 7  |
| 10 | 1099.5014 | 550.2544        | 1082.4749      | 541.7411         | 1081.4909      | 541.2491         | T    | 680.3614  | 340.6843        | 663.3348       | 332.1710         | 662.3508       | 331.6790         | 6  |
| 11 | 1198.5699 | 599.7886        | 1181.5433      | 591.2753         | 1180.5593      | 590.7833         | V    | 579.3137  | 290.1605        | 562.2871       | 281.6472         | 561.3031       | 281.1552         | 5  |
| 12 | 1345.6383 | 673.3228        | 1328.6117      | 664.8095         | 1327.6277      | 664.3175         | F    | 480.2453  | 240.6263        | 463.2187       | 232.1130         | 462.2347       | 231.6210         | 4  |
| 13 | 1460.6652 | 730.8362        | 1443.6387      | 722.3230         | 1442.6546      | 721.8310         | D    | 333.1769  | 167.0921        | 316.1503       | 158.5788         | 315.1663       | 158.0868         | 3  |
| 14 | 1531.7023 | 766.3548        | 1514.6758      | 757.8415         | 1513.6918      | 757.3495         | A    | 218.1499  | 109.5786        | 201.1234       | 101.0653         |                |                  | 2  |
| 15 |           |                 |                |                  |                |                  | K    | 147.1128  | 74.0600         | 130.0863       | 65.5468          |                |                  | 1  |

**Supplemental Figure S5. LC-MS/MS analysis for identification of GRP78 as an IL-34-binding molecule**  
 IL-34-Nst proteins in the plasma membrane fraction prepared from FL-Y-IL-34-Nst (IL-34-Nst) cells were pulled-down by using Strep-Tactin sepharose and eluted by 2.5 mM desthiobiotin. Eluate was separated by SDS-PAGE and subjected to mass spectrometry analysis. All of the identified GRP78 peptides are listed in Table 1. Data show the profile of identified peptides whose ions score was  $\geq 50$ .

GRP78: 187 DAGTIAGLNVMR 198

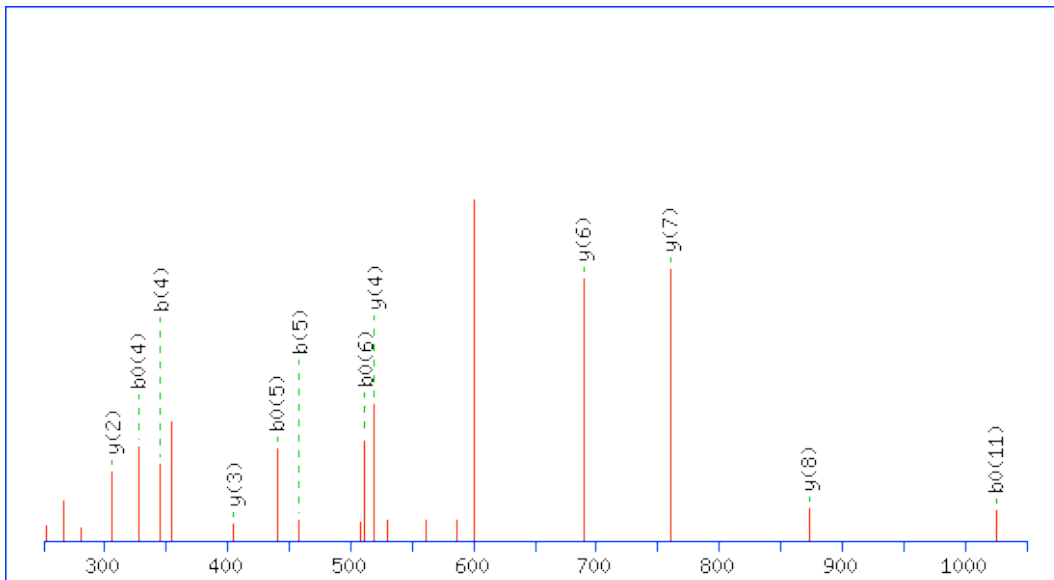

**Monoisotopic mass of neutral peptide Mr(calc): 1216.6234**

**Ions Score: 51 Expect: 0.0057**

**Matches : 12/100 fragment ions using 16 most intense peaks**

| #  | b         | b <sup>++</sup> | b <sup>*</sup> | b <sup>+++</sup> | b <sup>0</sup> | b <sup>0++</sup> | Seq. | y         | y <sup>++</sup> | y <sup>*</sup> | y <sup>+++</sup> | y <sup>0</sup> | y <sup>0++</sup> | #  |
|----|-----------|-----------------|----------------|------------------|----------------|------------------|------|-----------|-----------------|----------------|------------------|----------------|------------------|----|
| 1  | 115.0502  | 58.0287         | 98.0237        | 49.5155          |                |                  | N    |           |                 |                |                  |                |                  | 15 |
| 2  | 243.1088  | 122.0580        | 226.0822       | 113.5448         |                |                  | Q    | 1563.7649 | 782.3861        | 1546.7384      | 773.8728         | 1545.7544      | 773.3808         | 14 |
| 3  | 356.1928  | 178.6001        | 339.1663       | 170.0868         |                |                  | L    | 1435.7064 | 718.3568        | 1418.6798      | 709.8435         | 1417.6958      | 709.3515         | 13 |
| 4  | 457.2405  | 229.1239        | 440.2140       | 220.6106         | 439.2300       | 220.1186         | T    | 1322.6223 | 661.8148        | 1305.5957      | 653.3015         | 1304.6117      | 652.8095         | 12 |
| 5  | 544.2726  | 272.6399        | 527.2460       | 264.1266         | 526.2620       | 263.6346         | S    | 1221.5746 | 611.2909        | 1204.5481      | 602.7777         | 1203.5640      | 602.2857         | 11 |
| 6  | 658.3155  | 329.6614        | 641.2889       | 321.1481         | 640.3049       | 320.6561         | N    | 1134.5426 | 567.7749        | 1117.5160      | 559.2617         | 1116.5320      | 558.7696         | 10 |
| 7  | 755.3682  | 378.1878        | 738.3417       | 369.6745         | 737.3577       | 369.1825         | P    | 1020.4997 | 510.7535        | 1003.4731      | 502.2402         | 1002.4891      | 501.7482         | 9  |
| 8  | 884.4108  | 442.7091        | 867.3843       | 434.1958         | 866.4003       | 433.7038         | E    | 923.4469  | 462.2271        | 906.4203       | 453.7138         | 905.4363       | 453.2218         | 8  |
| 9  | 998.4538  | 499.7305        | 981.4272       | 491.2172         | 980.4432       | 490.7252         | N    | 794.4043  | 397.7058        | 777.3777       | 389.1925         | 776.3937       | 388.7005         | 7  |
| 10 | 1099.5014 | 550.2544        | 1082.4749      | 541.7411         | 1081.4909      | 541.2491         | T    | 680.3614  | 340.6843        | 663.3348       | 332.1710         | 662.3508       | 331.6790         | 6  |
| 11 | 1198.5699 | 599.7886        | 1181.5433      | 591.2753         | 1180.5593      | 590.7833         | V    | 579.3137  | 290.1605        | 562.2871       | 281.6472         | 561.3031       | 281.1552         | 5  |
| 12 | 1345.6383 | 673.3228        | 1328.6117      | 664.8095         | 1327.6277      | 664.3175         | F    | 480.2453  | 240.6263        | 463.2187       | 232.1130         | 462.2347       | 231.6210         | 4  |
| 13 | 1460.6652 | 730.8362        | 1443.6387      | 722.3230         | 1442.6546      | 721.8310         | D    | 333.1769  | 167.0921        | 316.1503       | 158.5788         | 315.1663       | 158.0868         | 3  |
| 14 | 1531.7023 | 766.3548        | 1514.6758      | 757.8415         | 1513.6918      | 757.3495         | A    | 218.1499  | 109.5786        | 201.1234       | 101.0653         |                |                  | 2  |
| 15 |           |                 |                |                  |                |                  | K    | 147.1128  | 74.0600         | 130.0863       | 65.5468          |                |                  | 1  |

GRP78: 449 SQIFSTASDNQPTVTIK 465

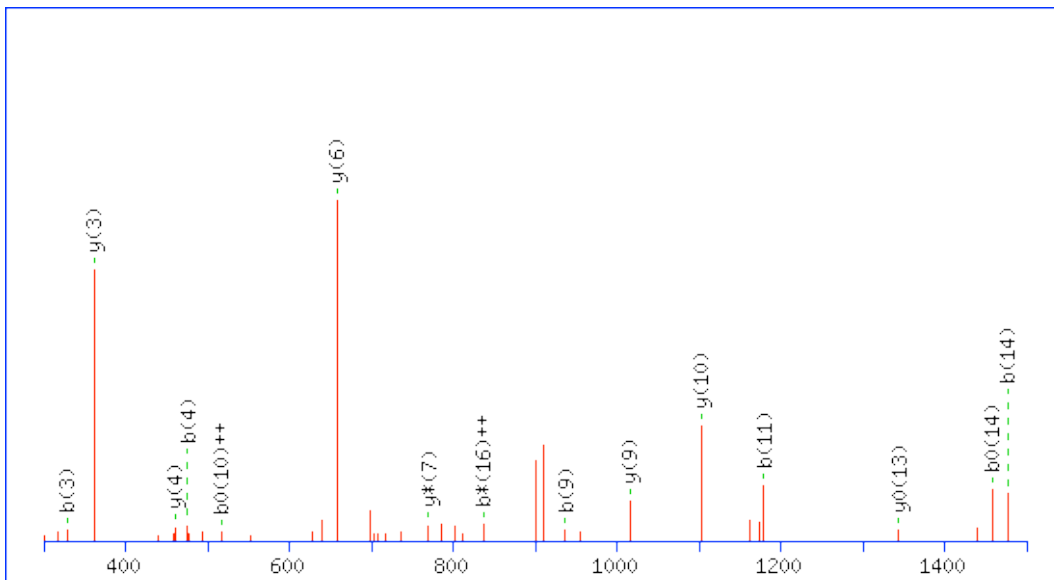

Monoisotopic mass of neutral peptide Mr(calc): 1835.9265

Ions Score: 50 Expect: 0.0045

Matches : 15/186 fragment ions using 20 most intense peaks

| #  | b                | b <sup>++</sup> | b <sup>*</sup> | b <sup>+++</sup> | b <sup>0</sup>   | b <sup>0++</sup> | Seq. | y                | y <sup>++</sup> | y <sup>*</sup>  | y <sup>+++</sup> | y <sup>0</sup>   | y <sup>0++</sup> | #  |
|----|------------------|-----------------|----------------|------------------|------------------|------------------|------|------------------|-----------------|-----------------|------------------|------------------|------------------|----|
| 1  | 88.0393          | 44.5233         |                |                  | 70.0287          | 35.5180          | S    |                  |                 |                 |                  |                  |                  | 17 |
| 2  | 216.0979         | 108.5526        | 199.0713       | 100.0393         | 198.0873         | 99.5473          | Q    | 1749.9018        | 875.4545        | 1732.8752       | 866.9412         | 1731.8912        | 866.4492         | 16 |
| 3  | <b>329.1819</b>  | 165.0946        | 312.1554       | 156.5813         | 311.1714         | 156.0893         | I    | 1621.8432        | 811.4252        | 1604.8166       | 802.9120         | 1603.8326        | 802.4199         | 15 |
| 4  | <b>476.2504</b>  | 238.6288        | 459.2238       | 230.1155         | 458.2398         | 229.6235         | F    | 1508.7591        | 754.8832        | 1491.7326       | 746.3699         | 1490.7486        | 745.8779         | 14 |
| 5  | 563.2824         | 282.1448        | 546.2558       | 273.6316         | 545.2718         | 273.1395         | S    | 1361.6907        | 681.3490        | 1344.6642       | 672.8357         | <b>1343.6801</b> | 672.3437         | 13 |
| 6  | 664.3301         | 332.6687        | 647.3035       | 324.1554         | 646.3195         | 323.6634         | T    | 1274.6587        | 637.8330        | 1257.6321       | 629.3197         | 1256.6481        | 628.8277         | 12 |
| 7  | 735.3672         | 368.1872        | 718.3406       | 359.6740         | 717.3566         | 359.1819         | A    | 1173.6110        | 587.3091        | 1156.5844       | 578.7959         | 1155.6004        | 578.3039         | 11 |
| 8  | 822.3992         | 411.7032        | 805.3727       | 403.1900         | 804.3886         | 402.6980         | S    | <b>1102.5739</b> | 551.7906        | 1085.5473       | 543.2773         | 1084.5633        | 542.7853         | 10 |
| 9  | <b>937.4262</b>  | 469.2167        | 920.3996       | 460.7034         | 919.4156         | 460.2114         | D    | <b>1015.5419</b> | 508.2746        | 998.5153        | 499.7613         | 997.5313         | 499.2693         | 9  |
| 10 | 1051.4691        | 526.2382        | 1034.4425      | 517.7249         | 1033.4585        | <b>517.2329</b>  | N    | 900.5149         | 450.7611        | 883.4884        | 442.2478         | 882.5043         | 441.7558         | 8  |
| 11 | <b>1179.5277</b> | 590.2675        | 1162.5011      | 581.7542         | 1161.5171        | 581.2622         | Q    | 786.4720         | 393.7396        | <b>769.4454</b> | 385.2264         | 768.4614         | 384.7343         | 7  |
| 12 | 1276.5804        | 638.7938        | 1259.5539      | 630.2806         | 1258.5699        | 629.7886         | P    | <b>658.4134</b>  | 329.7103        | 641.3869        | 321.1971         | 640.4028         | 320.7051         | 6  |
| 13 | 1377.6281        | 689.3177        | 1360.6016      | 680.8044         | 1359.6175        | 680.3124         | T    | 561.3606         | 281.1840        | 544.3341        | 272.6707         | 543.3501         | 272.1787         | 5  |
| 14 | <b>1476.6965</b> | 738.8519        | 1459.6700      | 730.3386         | <b>1458.6859</b> | 729.8466         | V    | <b>460.3130</b>  | 230.6601        | 443.2864        | 222.1468         | 442.3024         | 221.6548         | 4  |
| 15 | 1577.7442        | 789.3757        | 1560.7176      | 780.8625         | 1559.7336        | 780.3705         | T    | <b>361.2445</b>  | 181.1259        | 344.2180        | 172.6126         | 343.2340         | 172.1206         | 3  |
| 16 | 1690.8283        | 845.9178        | 1673.8017      | <b>837.4045</b>  | 1672.8177        | 836.9125         | I    | 260.1969         | 130.6021        | 243.1703        | 122.0888         |                  |                  | 2  |
| 17 |                  |                 |                |                  |                  |                  | K    | 147.1128         | 74.0600         | 130.0863        | 65.5468          |                  |                  | 1  |



GRP78: 525 ITITNDQNR 533

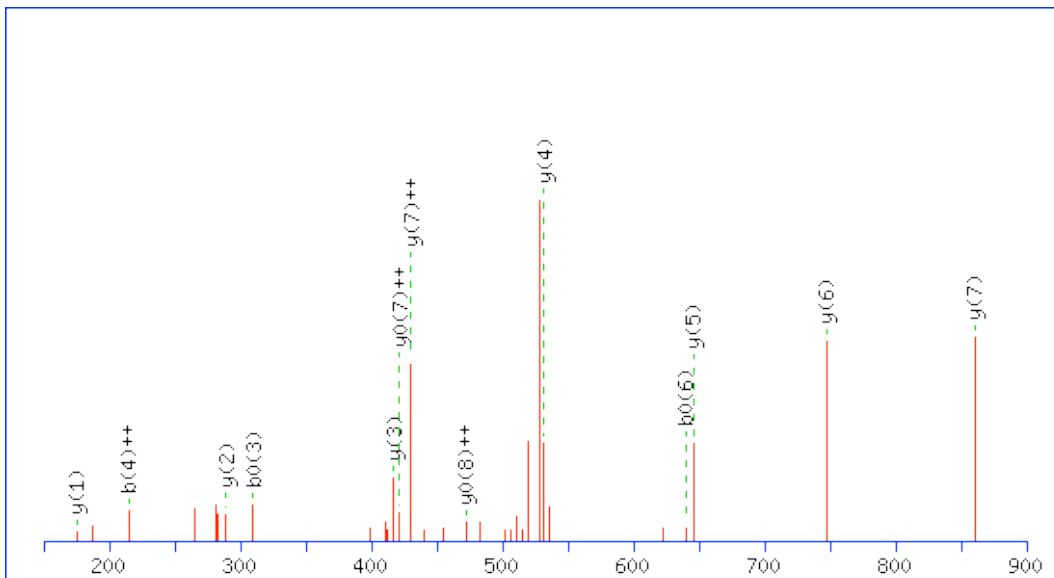**Monoisotopic mass of neutral peptide Mr(calc): 1073.5465****Ions Score: 60 Expect: 0.0009****Matches : 14/80 fragment ions using 21 most intense peaks**

| # | b               | b <sup>++</sup> | b <sup>*</sup> | b <sup>+++</sup> | b <sup>0</sup>  | b <sup>0++</sup> | Seq. | y               | y <sup>++</sup> | y <sup>*</sup> | y <sup>+++</sup> | y <sup>0</sup> | y <sup>0++</sup> | # |
|---|-----------------|-----------------|----------------|------------------|-----------------|------------------|------|-----------------|-----------------|----------------|------------------|----------------|------------------|---|
| 1 | 114.0913        | 57.5493         |                |                  |                 |                  | I    |                 |                 |                |                  |                |                  | 9 |
| 2 | <b>215.1390</b> | 108.0731        |                |                  | 197.1285        | 99.0679          | T    | 961.4697        | 481.2385        | 944.4432       | 472.7252         | 943.4592       | <b>472.2332</b>  | 8 |
| 3 | 328.2231        | 164.6152        |                |                  | <b>310.2125</b> | 155.6099         | I    | <b>860.4221</b> | <b>430.7147</b> | 843.3955       | 422.2014         | 842.4115       | <b>421.7094</b>  | 7 |
| 4 | 429.2708        | <b>215.1390</b> |                |                  | 411.2602        | 206.1337         | T    | <b>747.3380</b> | 374.1726        | 730.3115       | 365.6594         | 729.3274       | 365.1674         | 6 |
| 5 | 543.3137        | 272.1605        | 526.2871       | 263.6472         | 525.3031        | 263.1552         | N    | <b>646.2903</b> | 323.6488        | 629.2638       | 315.1355         | 628.2798       | 314.6435         | 5 |
| 6 | 658.3406        | 329.6740        | 641.3141       | 321.1607         | <b>640.3301</b> | 320.6687         | D    | <b>532.2474</b> | 266.6273        | 515.2209       | 258.1141         | 514.2368       | 257.6221         | 4 |
| 7 | 786.3992        | 393.7032        | 769.3727       | 385.1900         | 768.3886        | 384.6980         | Q    | <b>417.2205</b> | 209.1139        | 400.1939       | 200.6006         |                |                  | 3 |
| 8 | 900.4421        | 450.7247        | 883.4156       | 442.2114         | 882.4316        | 441.7194         | N    | <b>289.1619</b> | 145.0846        | 272.1353       | 136.5713         |                |                  | 2 |
| 9 |                 |                 |                |                  |                 |                  | R    | <b>175.1190</b> | 88.0631         | 158.0924       | 79.5498          |                |                  | 1 |

GRP78: 564 NELESYAYSLK 574

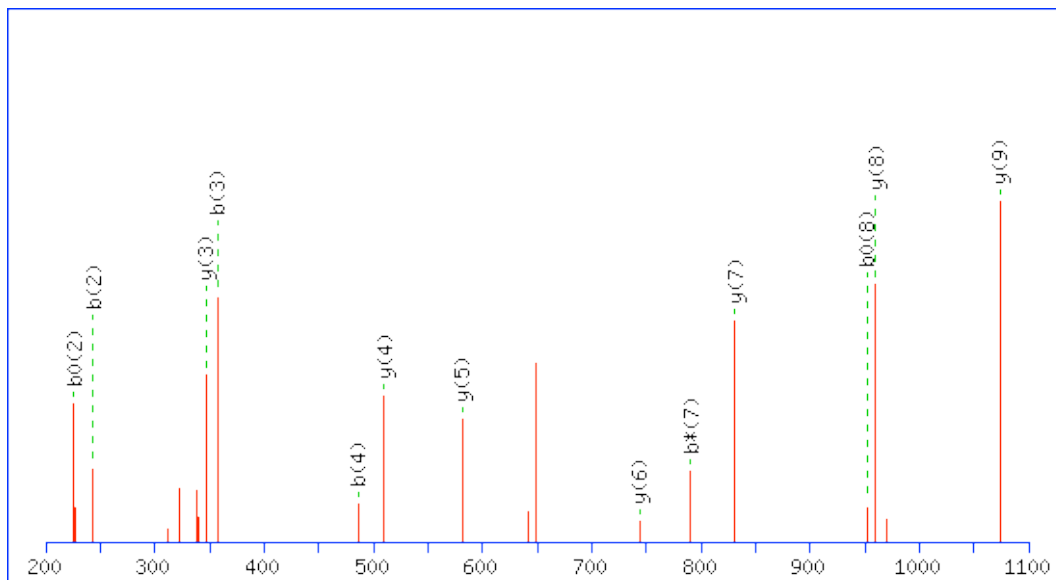Monoisotopic mass of neutral peptide  $M_r(\text{calc})$ : 1315.6295

Ions Score: 71 Expect: 3.7e-005

Matches : 13/114 fragment ions using 15 most intense peaks

| #  | b               | b <sup>++</sup> | b <sup>*</sup>  | b <sup>+++</sup> | b <sup>0</sup>  | b <sup>0++</sup> | Seq. | y                | y <sup>++</sup> | y <sup>*</sup> | y <sup>+++</sup> | y <sup>0</sup> | y <sup>0++</sup> | #  |
|----|-----------------|-----------------|-----------------|------------------|-----------------|------------------|------|------------------|-----------------|----------------|------------------|----------------|------------------|----|
| 1  | 115.0502        | 58.0287         | 98.0237         | 49.5155          |                 |                  | N    |                  |                 |                |                  |                |                  | 11 |
| 2  | <b>244.0928</b> | 122.5500        | 227.0662        | 114.0368         | <b>226.0822</b> | 113.5448         | E    | 1202.5939        | 601.8006        | 1185.5674      | 593.2873         | 1184.5834      | 592.7953         | 10 |
| 3  | <b>357.1769</b> | 179.0921        | 340.1503        | 170.5788         | 339.1663        | 170.0868         | L    | <b>1073.5514</b> | 537.2793        | 1056.5248      | 528.7660         | 1055.5408      | 528.2740         | 9  |
| 4  | <b>486.2195</b> | 243.6134        | 469.1929        | 235.1001         | 468.2089        | 234.6081         | E    | <b>960.4673</b>  | 480.7373        | 943.4407       | 472.2240         | 942.4567       | 471.7320         | 8  |
| 5  | 573.2515        | 287.1294        | 556.2249        | 278.6161         | 555.2409        | 278.1241         | S    | <b>831.4247</b>  | 416.2160        | 814.3981       | 407.7027         | 813.4141       | 407.2107         | 7  |
| 6  | 736.3148        | 368.6610        | 719.2883        | 360.1478         | 718.3042        | 359.6558         | Y    | <b>744.3927</b>  | 372.7000        | 727.3661       | 364.1867         | 726.3821       | 363.6947         | 6  |
| 7  | 807.3519        | 404.1796        | <b>790.3254</b> | 395.6663         | 789.3414        | 395.1743         | A    | <b>581.3293</b>  | 291.1683        | 564.3028       | 282.6550         | 563.3188       | 282.1630         | 5  |
| 8  | 970.4153        | 485.7113        | 953.3887        | 477.1980         | <b>952.4047</b> | 476.7060         | Y    | <b>510.2922</b>  | 255.6498        | 493.2657       | 247.1365         | 492.2817       | 246.6445         | 4  |
| 9  | 1057.4473       | 529.2273        | 1040.4207       | 520.7140         | 1039.4367       | 520.2220         | S    | <b>347.2289</b>  | 174.1181        | 330.2023       | 165.6048         | 329.2183       | 165.1128         | 3  |
| 10 | 1170.5313       | 585.7693        | 1153.5048       | 577.2560         | 1152.5208       | 576.7640         | L    | 260.1969         | 130.6021        | 243.1703       | 122.0888         |                |                  | 2  |
| 11 |                 |                 |                 |                  |                 |                  | K    | 147.1128         | 74.0600         | 130.0863       | 65.5468          |                |                  | 1  |

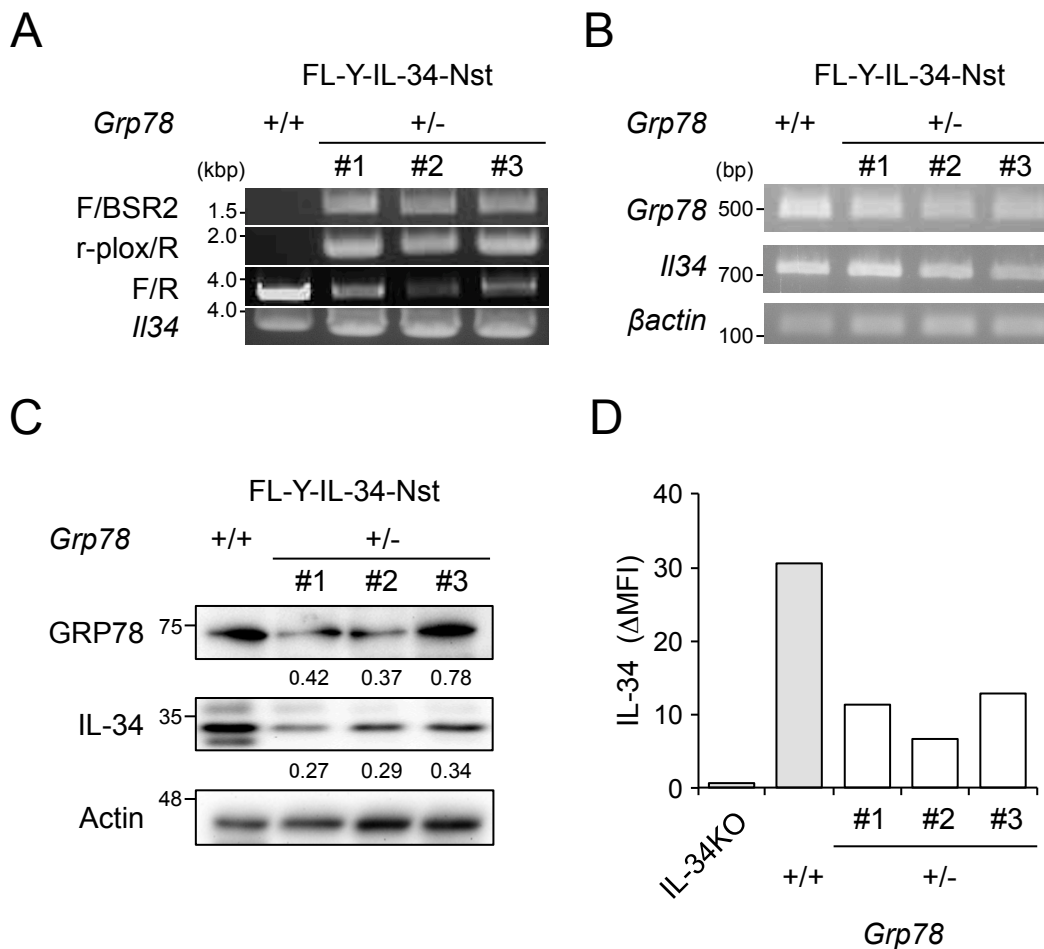

**Supplemental Figure S6. GRP78 regulates IL-34 expression on cell surface of FL-Y-IL-34-Nst cells.**

(A) Genomic PCR analysis of GRP78-heterozygous (+/-) FL-Y-IL-34-Nst cells. PCR primers used are shown in Fig. 5A. (B) RT-PCR analysis of *Grp78* and *Il34* mRNA expression in GRP78 (+/-) FL-Y-IL-34-Nst cells. (C) Western blot analysis of GRP78 expressed in GRP78 (+/-) FL-Y-IL-34-Nst cells. Whole cell lysates were separated by SDS-PAGE and subjected to western blotting. (D) IL-34 expression on the cell surface of the GRP78 (+/-) FL-Y-IL-34-Nst cell line was determined by flow cytometry after staining with an anti-IL-34 Ab. The level of IL-34 cell-surface expression is indicated as described in Fig. 2C (delta MFI). Data are representative of at least three independent experiments.

Table S1. Primers used for PCR and RT-PCR in this study

| Primer                                      | Sequence (5'-3')                                                                                            |
|---------------------------------------------|-------------------------------------------------------------------------------------------------------------|
| Construction of IL-34 KO vector             |                                                                                                             |
| IL-34-3'-F                                  | TGCGGCCGCCAGTGCTGTGTTAGGTGATC                                                                               |
| IL-34-3'-R                                  | AGTAGGATCCCAAGACCTGTGGGACACACC                                                                              |
| IL-34-5'-F                                  | CTGCAGTACAGGATCCGGCTTCAGTACATG                                                                              |
| IL-34-5'-R                                  | AGCAATCGATTAGTTGATGGGGAAGTAATG                                                                              |
| Construction of IL-34 gRNA vector           |                                                                                                             |
| IL-34-guide2 (sense)                        | AACACCGGCTTTGGGAAACGAGAATTGT                                                                                |
| IL-34-guide2 (antisense)                    | TAAAACAATTCTCGTTTCCCAAAGCCGG                                                                                |
| IL-34-guide3 (sense)                        | AACACCGACCTTACAGGCTACCTTCGGT                                                                                |
| IL-34-guide3 (antisense)                    | TAAAACCGAAGGTAGCCTGTAAGGTCGG                                                                                |
| IL-34-guide4 (sense)                        | AACACCGCGAGAGCTTCGGTACCTGTGT                                                                                |
| IL-34-guide4 (antisense)                    | TAAAACACAGGTACCGAAGCTCTCGCGG                                                                                |
| Targeting check for IL-34 KO allele         |                                                                                                             |
| IL-34-F                                     | CCAAGATGCTATGACCTGGCTAGGTGATGAGTG                                                                           |
| IL-34-R                                     | CGAAGCTCTCGCTCACTCACGTGAGCCTTC                                                                              |
| Puro                                        | CAGCGCCCGACCGAAAGGAGCGCACGACC                                                                               |
| BSR2                                        | GTGATGATGAGGCTACTGCTGACTCTCAACATTCTACTCCTCC                                                                 |
| r-plox                                      | TCGAGGATCTGGGCTAGCCCTGATCAATAAC                                                                             |
| Construction of IL-34 expression vector     |                                                                                                             |
| mIL-34-F-Kozak-EcoRI                        | GGGGAATTCAGTGCGCCACCATGCCCTG                                                                                |
| IL-34-R2-BglIII                             | CCAGATCTACTAGGGCAACGAGCC                                                                                    |
| Construction of IL-34-Nst expression vector |                                                                                                             |
| IL-34-Strep-1 <sup>st</sup>                 | <u>CGCAGTTCGAGAAAGGTGGAGGTTCCGGAGGTGGATCGGGAGGTTCCGGCTGGAGCCACCCGCAGTTCGAAAAAACGAGAATTTG</u>                |
| IL-34-Strep-2 <sup>nd</sup>                 | GGAATTCAGTGCGCCACCATGCCCTGGGGACTCGCCTGGCTATACTG<br>TCTTGGGATCCTACTTGACGTGGCTTTGGGATGGAGCCACCCGCAGT<br>TCGAG |
| IL-34-R2-BglIII                             | CCAGATCTACTAGGGCAACGAGCC                                                                                    |
| Construction of GRP78 KO vector             |                                                                                                             |
| GRP78-5'-F                                  | GAATTCATCTCATGGTGGAAAGTGCTCG                                                                                |
| GRP78-5'-R                                  | GGATCCAGCAGTCAGGCAGGAGTCTTAG                                                                                |
| GRP78-3'-F                                  | GGATCCGGCGGCGTTGCTGCTGCTG                                                                                   |
| GRP78-3'-R                                  | GCGGCCGCTCAAACACTCAACACTG                                                                                   |
| Construction of GRP78 gRNA vector           |                                                                                                             |
| GRP78-guide 1 (sense)                       | AACACCGGAGCGACTGGTCCTCAGCGCGT                                                                               |
| GRP78-guide 1 (antisense)                   | TAAAACGCGCTGAGGACCAGTTCGCTCCGG                                                                              |

| Targeting check for GRP78 KO allele |                                       |
|-------------------------------------|---------------------------------------|
| GRP78-F                             | TATCAGCCCTATTCCAAGAGTCGAATAGGGTGGTG   |
| GRP78-R                             | GTGAGATGGCTCGGCAGGTAAGGGC             |
| <i>il34</i> mRNA                    |                                       |
| F                                   | GACACACTTCTGGGGACAGTGCCTC             |
| ex3F                                | GAGATATGGACTCTGACCCAAGATAAGGAGTGTG    |
| R                                   | GCTCAGGGCAACGAGCCATGGCTTG             |
| <i>csf1</i> mRNA                    |                                       |
| F                                   | GCCGGGAATTCGCTGCCACCATGAC             |
| R                                   | CATAGAATTCTTTCTATACTGGCAGTCCACCTGTCTG |
| <i>grp78</i> mRNA                   |                                       |
| F                                   | CTCGAGGAGGAGGAGGACAAGAAGG             |
| R                                   | GGATCCCTACAACATCATCTTTTCTGATGTATC     |
| <i><math>\beta</math>actin</i> mRNA |                                       |
| F                                   | AGTGTGACGTTGACATCCGTA                 |
| R                                   | GCCAGAGCAGTAATCTCCTTCT                |
